# Supplementary material
Source: PubMed Central journal article supplement (PMC4832577)
Supplement: NIHMS773780-supplement-1.pdf [file NIHMS773780-supplement-1.pdf]

## Supplemental Figure Legends

### Supplemental Figure 1, related to Figure 1. Primary T-ALL utilizes aerobic glycolysis that is required for cell survival.

**A-D.** Primary human T-ALL samples and naïve human CD4 T cells were compared for **(A)** expression of Glut1, **(B)** Hexokinase II and **(C)** Hexokinase I by intracellular flow cytometry and **(D)** extracellular acidification rate (ECAR). **E-F.** Primary human T-ALL samples were treated with vehicle or 2-deoxyglucose (2DG) and the percentage of viable cells that were T-ALL cells (CD4+CD8+) or CD4+ T cells was measured by propidium iodide exclusion flow cytometry. **G.** Naïve human CD4+ T cells were isolated from healthy independent donor blood and were treated with vehicle or 10 mM 2-deoxyglucose (2DG) and viability was measured over time by propidium iodide exclusion flow cytometry. Data are the mean and standard deviation of six independent samples **(A-C)**, two independent experiments **(D)**, are representative of the mean and standard deviation of technical triplicates of independent human T-ALL samples **(E-F)** or are representative of the mean and standard deviation of three independent experiments **(G)**. (\*  $p < 0.05$ )

### Supplemental Figure 2, related to Figure 1. Glycolysis supports disease progression in primary T-ALL.

**A-G.** Primary T-ALL was generated on a **(A)**  $\text{Glut1}^{\text{flox/flox}}; \text{Rosa26CreER}^{\text{T2}}$  or **(B-G)**  $\text{HK2}^{\text{flox/flox}}; \text{Rosa26CreER}^{\text{T2}}$  inducible deletion background and transplanted into sublethally irradiated recipient mice. Mice were treated with vehicle or

tamoxifen 10 days after transplant and **(A, B, D-G)** sacrificed 2 days after treatment completion or treated with tamoxifen to measure **(C)** overall survival in mice with HK2<sup>flox/flox</sup>;Rosa26CreER<sup>T2</sup> T-ALL. T-ALL cells were isolated and the deletion efficiency of **(A)** Glut1 or **(B)** Hexokinase II was measured by immunoblot. **(D)** T-ALL burden was measured in the spleens of mice treated with vehicle or tamoxifen to delete HK2. **(E)** Pentose phosphate pathway activity was measured by production of <sup>14</sup>CO<sub>2</sub> from 1-<sup>14</sup>C-Glucose in T-ALL cells isolated from the spleens of mice treated with vehicle or tamoxifen to delete HK2. **F-G.** T-ALL cells were extracted from the spleens of mice treated with vehicle or tamoxifen to delete HK2 and analyzed using high-resolution LC-QE-MS for metabolomics analysis. Select analytes are shown. Data are representative of two independent experiments **(A-D)** or the mean and standard deviation of four independent samples **(E-G)**. (\* p<0.05)

**Supplemental Figure 3, related to Figure 1. Cre activation alone does not alter T-ALL disease severity or metabolic traits *in vivo*.**

Primary T-ALL was generated on a wild type (no floxed alleles);Rosa26CreER<sup>T2</sup> background and transplanted into sublethally irradiated recipient mice. Mice were treated with vehicle or tamoxifen for 4 consecutive days to induce Cre activity 4 days after T-ALL transplant and **(A)** survival was monitored. Other mice were treated with vehicle or tamoxifen 10 days after transplant, sacrificed 2 days after treatment completion **(B)** and the **(C)** cellularity of the spleen, **(D)** number of T-ALL cells in the spleen and **(E)** percentage of T-ALL cells in the

spleen was assessed. T-ALL cells were isolated and the **(E)** pentose phosphate pathway activity was measured by production of  $^{14}\text{CO}_2$  from 1- $^{14}\text{C}$ -Glucose. Isolated cells were also assayed for **(F)** extracellular acidification rate and **(G)** oxygen consumption rate. Data are representative of two independent experiments with at least 5 mice per group **(A-E)**, two independent experiments with four samples per group **(F)** or two independent experiments with three samples per group **(G-H)**. (ns. Not Significant)

**Supplemental Figure 4, related to Figure 2. Primary T-ALL glycolytic metabolism is limited, with increased oxidative metabolism.**

Naïve T cells, T cells that were activated *in vitro* for 24 or 48 hrs, and purified primary T-ALL cells mitotracker green and TMRE staining. Data is representative of at least 4 independent experiments and are shown as the mean and standard deviation. (\*  $p < 0.05$ , ns. Not Significant)

**Supplemental Figure 5, related to Figures 3-4. The PI3K pathway and c-Myc mediate oncogenic Notch induced metabolic changes.** Murine lineage

negative hematopoietic cells were isolated from the bone marrow of wild type **(A-D, F-G)** or  $\text{Glut1}^{\text{myc}}$  expressing **(E)** mice and retrovirally transduced with ICN1 or vector control. **(A)** Mitotracker green **(B)**, TMRE **(C)** and DCFDA staining were measured by flow cytometry. **D-F**. Cells were treated with vehicle, rapamycin (20 nM), LY29004 (10  $\mu\text{M}$ ), PP242 (1  $\mu\text{M}$ ) or JQ1 (1  $\mu\text{M}$ ) for 16 hrs and **(D)** cell size, **(E)** surface  $\text{Glut1}^{\text{myc}}$  expression and **(F)** hexokinase 2 expression were

measured by flow cytometry. **(G)** ICN1 and vector control transduced cell lysates were analyzed by immunoblot. Data are representative of at least three independent experiments. Data is shown as the mean and standard deviation. (\*  $p < 0.05$ , ns. Not Significant)

**Supplemental Figure 6, related to Figure 6. AMPK regulates mitochondrial Complex I in T-ALL.**

Primary T-ALL was generated on an AMPK $\alpha$ 1 inducible deletion background and transplanted into sublethally irradiated recipient mice. Mice were treated with vehicle or tamoxifen 10 days after transplant and sacrificed 2 days after treatment completion. Purified T-ALL cells from vehicle and tamoxifen treated groups were isolated for **(A)** rtPCR examination of select mitochondrial energy pathway gene expression, **(B)** immunoblot examination of select mitochondrial proteins and **(C)** colorimetric analysis of Complex I activity in cell lysate. Data represent an experiment with four independent T-ALL samples per group. (\*  $p < 0.05$ , ns. Not Significant)

**Supplemental Figure 7, related to Figure 7. Loss of AMPK or pharmacological inhibition of mitochondrial Complex I inhibits T-ALL growth and progression.**

**A-C.** Primary T-ALL was generated on an AMPK $\alpha$ 1 inducible deletion background and transplanted into sublethally irradiated recipient mice. **A.** Mice were treated with vehicle or tamoxifen for 4 days beginning 10 days after

transplant and sacrificed 2 days after treatment completion. Ki67 expression was analyzed by flow cytometry. **B-C**. Mice were treated with vehicle or tamoxifen for 4 days beginning 10 days after transplant and sacrificed 7 days after treatment completion. **(B)** T-ALL cell burden and percentage present in the bone marrow and **(C)** Annexin V and propidium iodide staining were measured by flow cytometry. **D**. Published datasets were examined for AMPK $\alpha$ 1 (PRKAA1) expression in primary human T-ALL compared with control cells (naïve T cells or whole bone marrow). **E**. Primary T-ALL was generated on a wild type background. T-ALL was isolated and was treated for 45 minutes with 100  $\mu$ M phenformin or PBS vehicle and the oxygen consumption rate (OCR)/extracellular acidification rate (ECAR) ratio was measured. **F**. Primary T-ALL was generated on a wild type background and transplanted into sublethally irradiated recipient mice. Mice were dosed daily with vehicle (PBS) or phenformin (100 mg/kg body weight) for 10 consecutive days starting two days after T-ALL transplant and survival was recorded. Data is representative of an experiment with seven mice per group **(A)** an experiment with eight mice per group **(B-C)** two independent experiments **(E)** and an experiment with at least seven mice per group. (\*  $p < 0.05$ )

## **Supplemental Table Legends**

### **Supplemental Table 1, related to Figure 1: Primary**

HK2flox/flox;Rosa26CreER<sup>T2</sup> T-ALL was transplanted into secondary recipient

mice. Mice were treated with vehicle or tamoxifen ten days after transplant and sacrificed five days after tamoxifen treatment. T-ALL cells were isolated and extracted for high resolution LC-QE-MS metabolomics. Range scaled area counts normalized using Metaboanalyst are reported.

Data are provided in separate Supplemental Data File in Excel format.

**Supplemental Table 2, related to Figure 2:** Naïve T cells, T cells that were activated on plate bound  $\alpha$ -CD3 and  $\alpha$ -CD28 for 24 or 48 hrs and primary T-ALL cells were isolated and extracted for high resolution LC-QE-MS metabolomics. Range scaled area counts normalized using Metaboanalyst are reported.

Data are provided in separate Supplemental Data File in Excel format.

**Supplemental Table 3, related to Figure 2.** Metabolic pathways altered in T-ALL cells relative to naïve T cells. Naïve T cells and primary TALL cells were isolated and extracted for high resolution LC-QE-MS metabolomics. Metabolites altered by 1.5-fold or more ( $p < 0.05$ ) were analyzed using Metaboanalyst Pathway Analysis and are listed below in respective pathways. Metabolites found to be significantly enriched in T-ALL cells compared to naïve T cells are indicated in red, while those significantly depleted in T-ALL cells compared to naïve T cells are indicated in green.

**Supplemental Table 4, related to Figure 2.** Metabolic pathways altered in T-

ALL cells relative to 48 hour activated T cells. T cells activated for 48 hours with anti-CD3 + anti-CD28 and primary TALL cells were isolated and extracted for high resolution LC-QE-MS metabolomics. Metabolites altered by 1.5-fold or more ( $p < 0.05$ ) were analyzed using Metaboanalyst Pathway Analysis and are listed below in respective pathways. Metabolites found to be significantly enriched in T-ALL cells compared to naïve T cells are indicated in red, while those significantly depleted in T-ALL cells compared to activated T cells are indicated in green.

**Supplemental Table 5, related to Figure 5:** Glucose metabolism qPCR Array Ct values for Figure 5D. Secondary recipient mice were transplanted with T-ALL from an  $AMPK\alpha1^{flox/flox}; Rosa26CreER^{T2}$  background primary cancer and treated with vehicle or tamoxifen. T-ALL cell were isolated and metabolic gene expression was determined by qrt-PCR array. Ct values for each independent mouse are provided.

**Supplemental Table 6, related to Figures 5-6:** Primary  $AMPK\alpha1^{flox/flox}; Rosa26CreER^{T2}$  T-ALL was transplanted into secondary recipient mice. Mice were treated with vehicle or tamoxifen ten days after transplant and sacrificed five days after tamoxifen treatment. T-ALL cells were isolated and extracted for high resolution LC-QE-MS metabolomics. Range scaled area counts normalized using Metaboanalyst are reported.

Data are provided in separate Supplemental Data File in Excel format.

**Supplemental Table 7, related to Figure 6:** Mitochondrial energy metabolism qPCR Array Ct values for Figure 6F, S6A. Secondary recipient mice were transplanted with T-ALL from an AMPK $\alpha$ 1<sup>flox/flox</sup>;Rosa26CreER<sup>T2</sup> background primary cancer and treated with vehicle or tamoxifen. T-ALL cell were isolated and metabolic gene expression was determined by qrt-PCR array. Ct values for each independent mouse are provided.



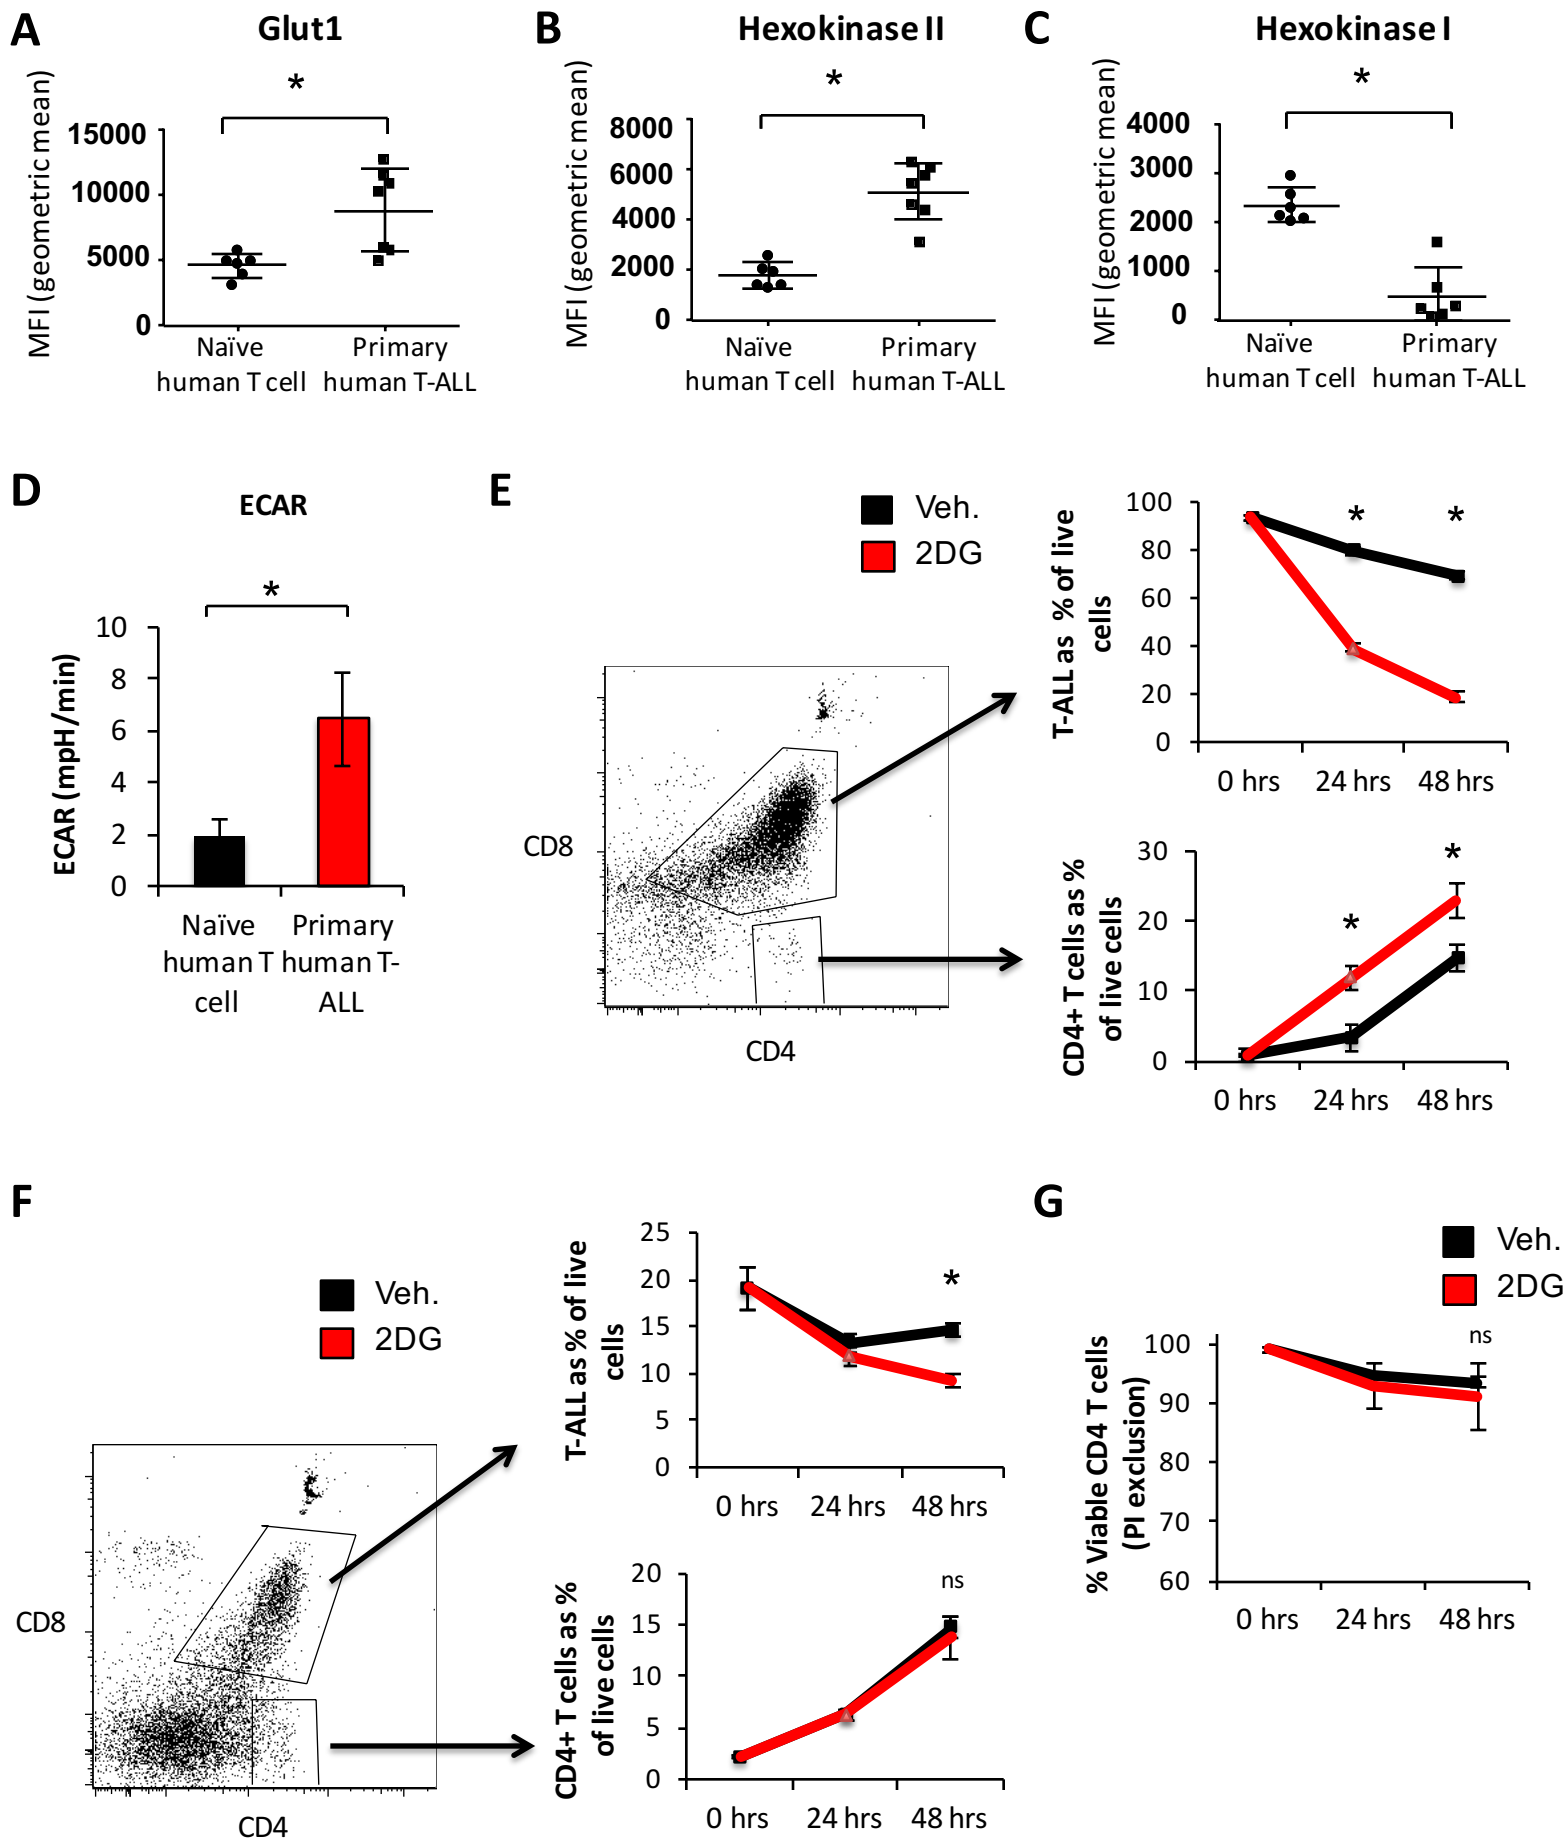

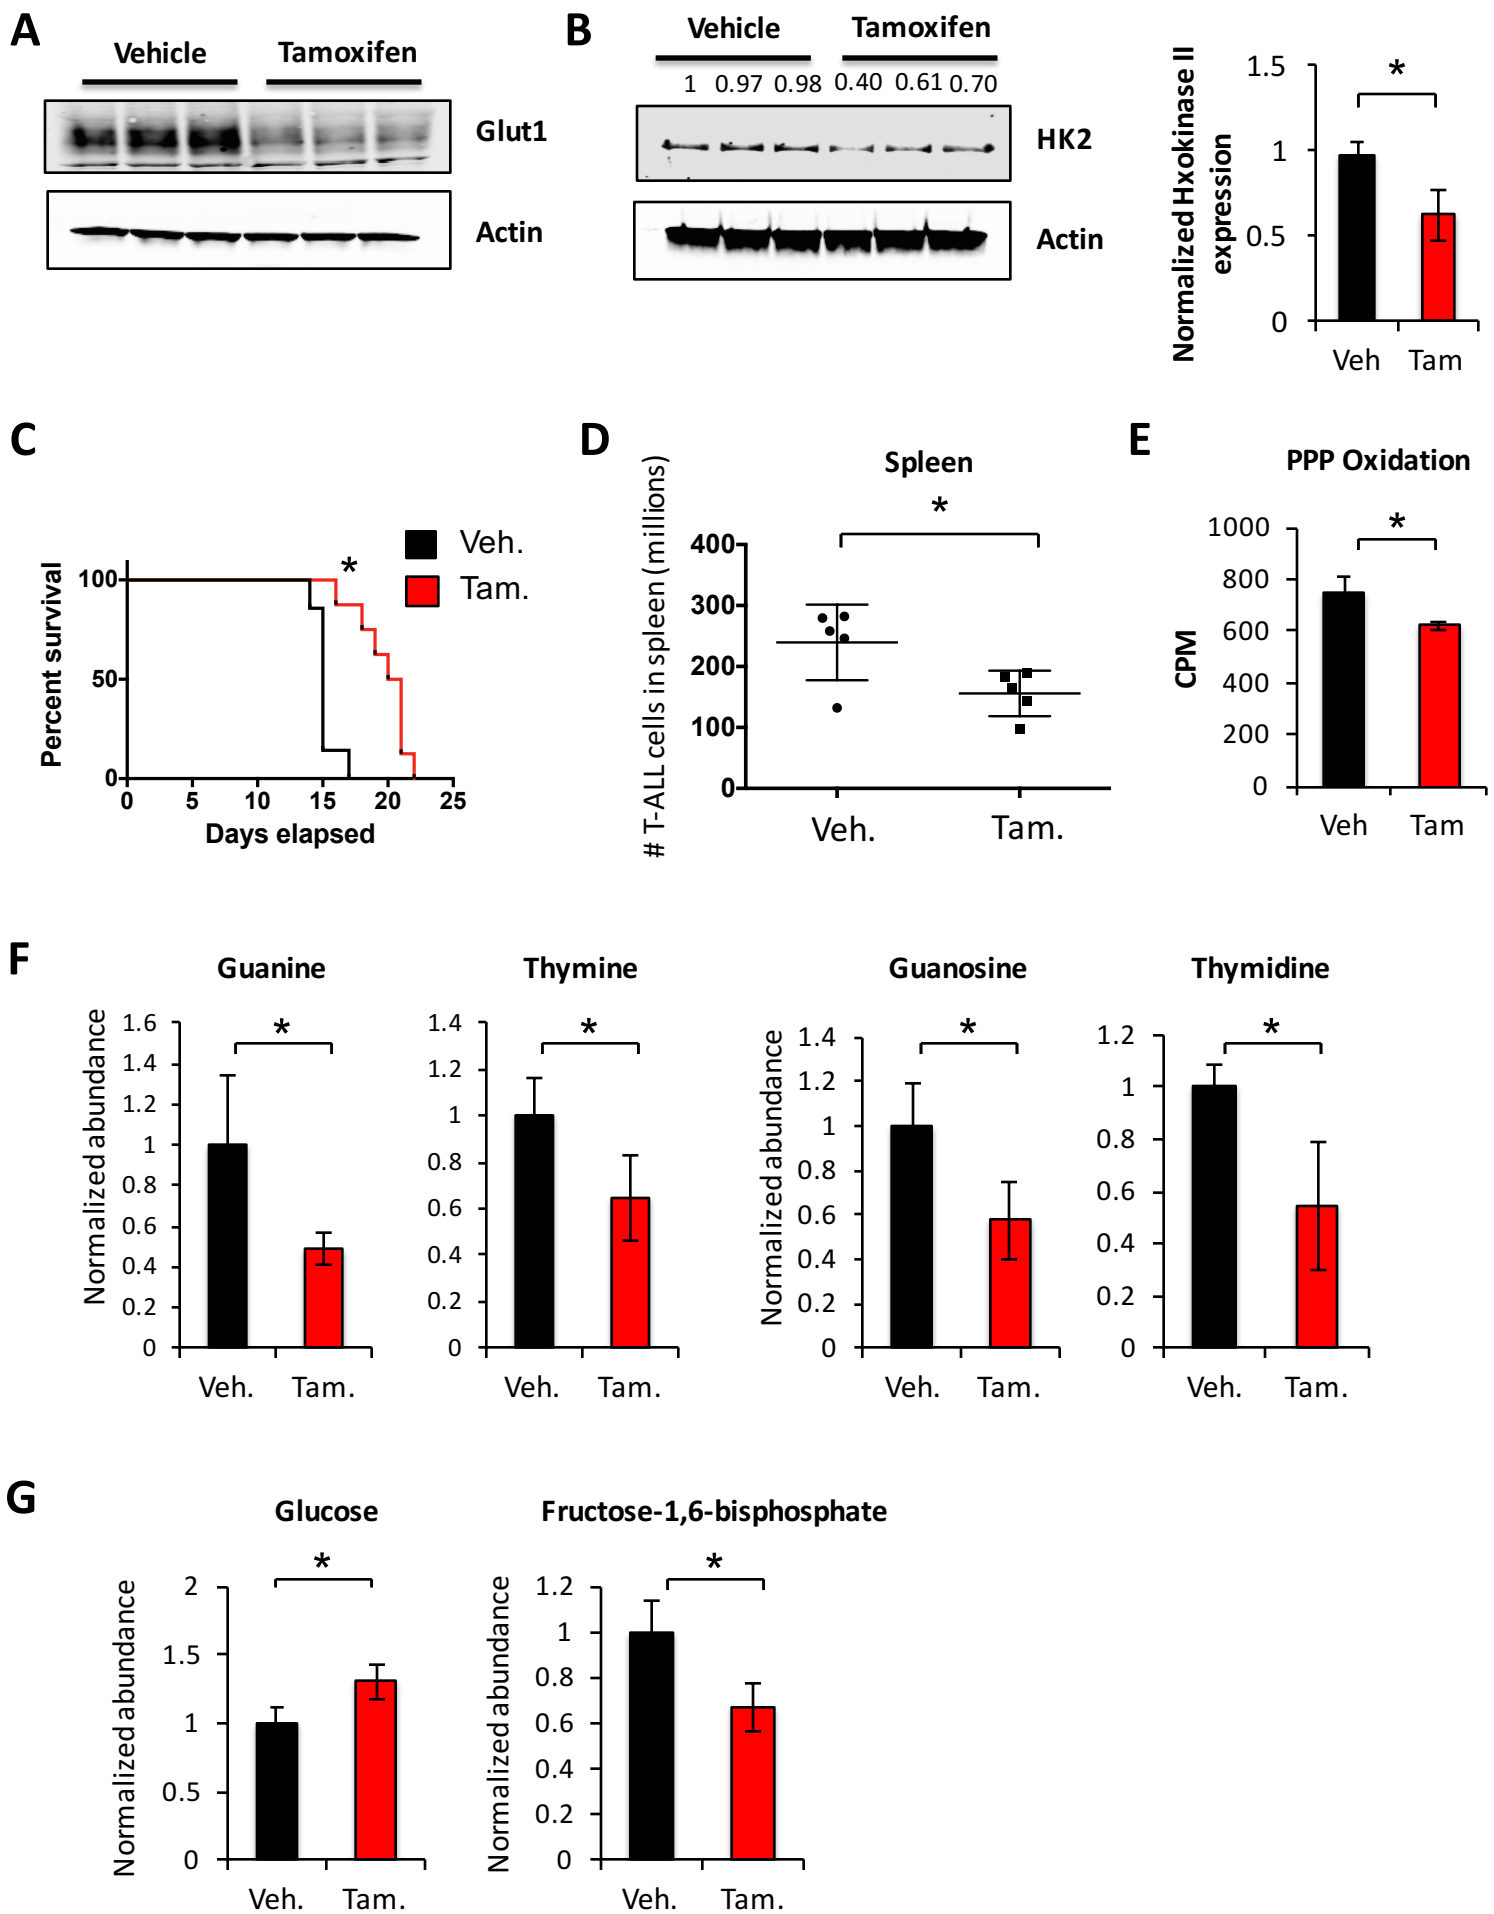

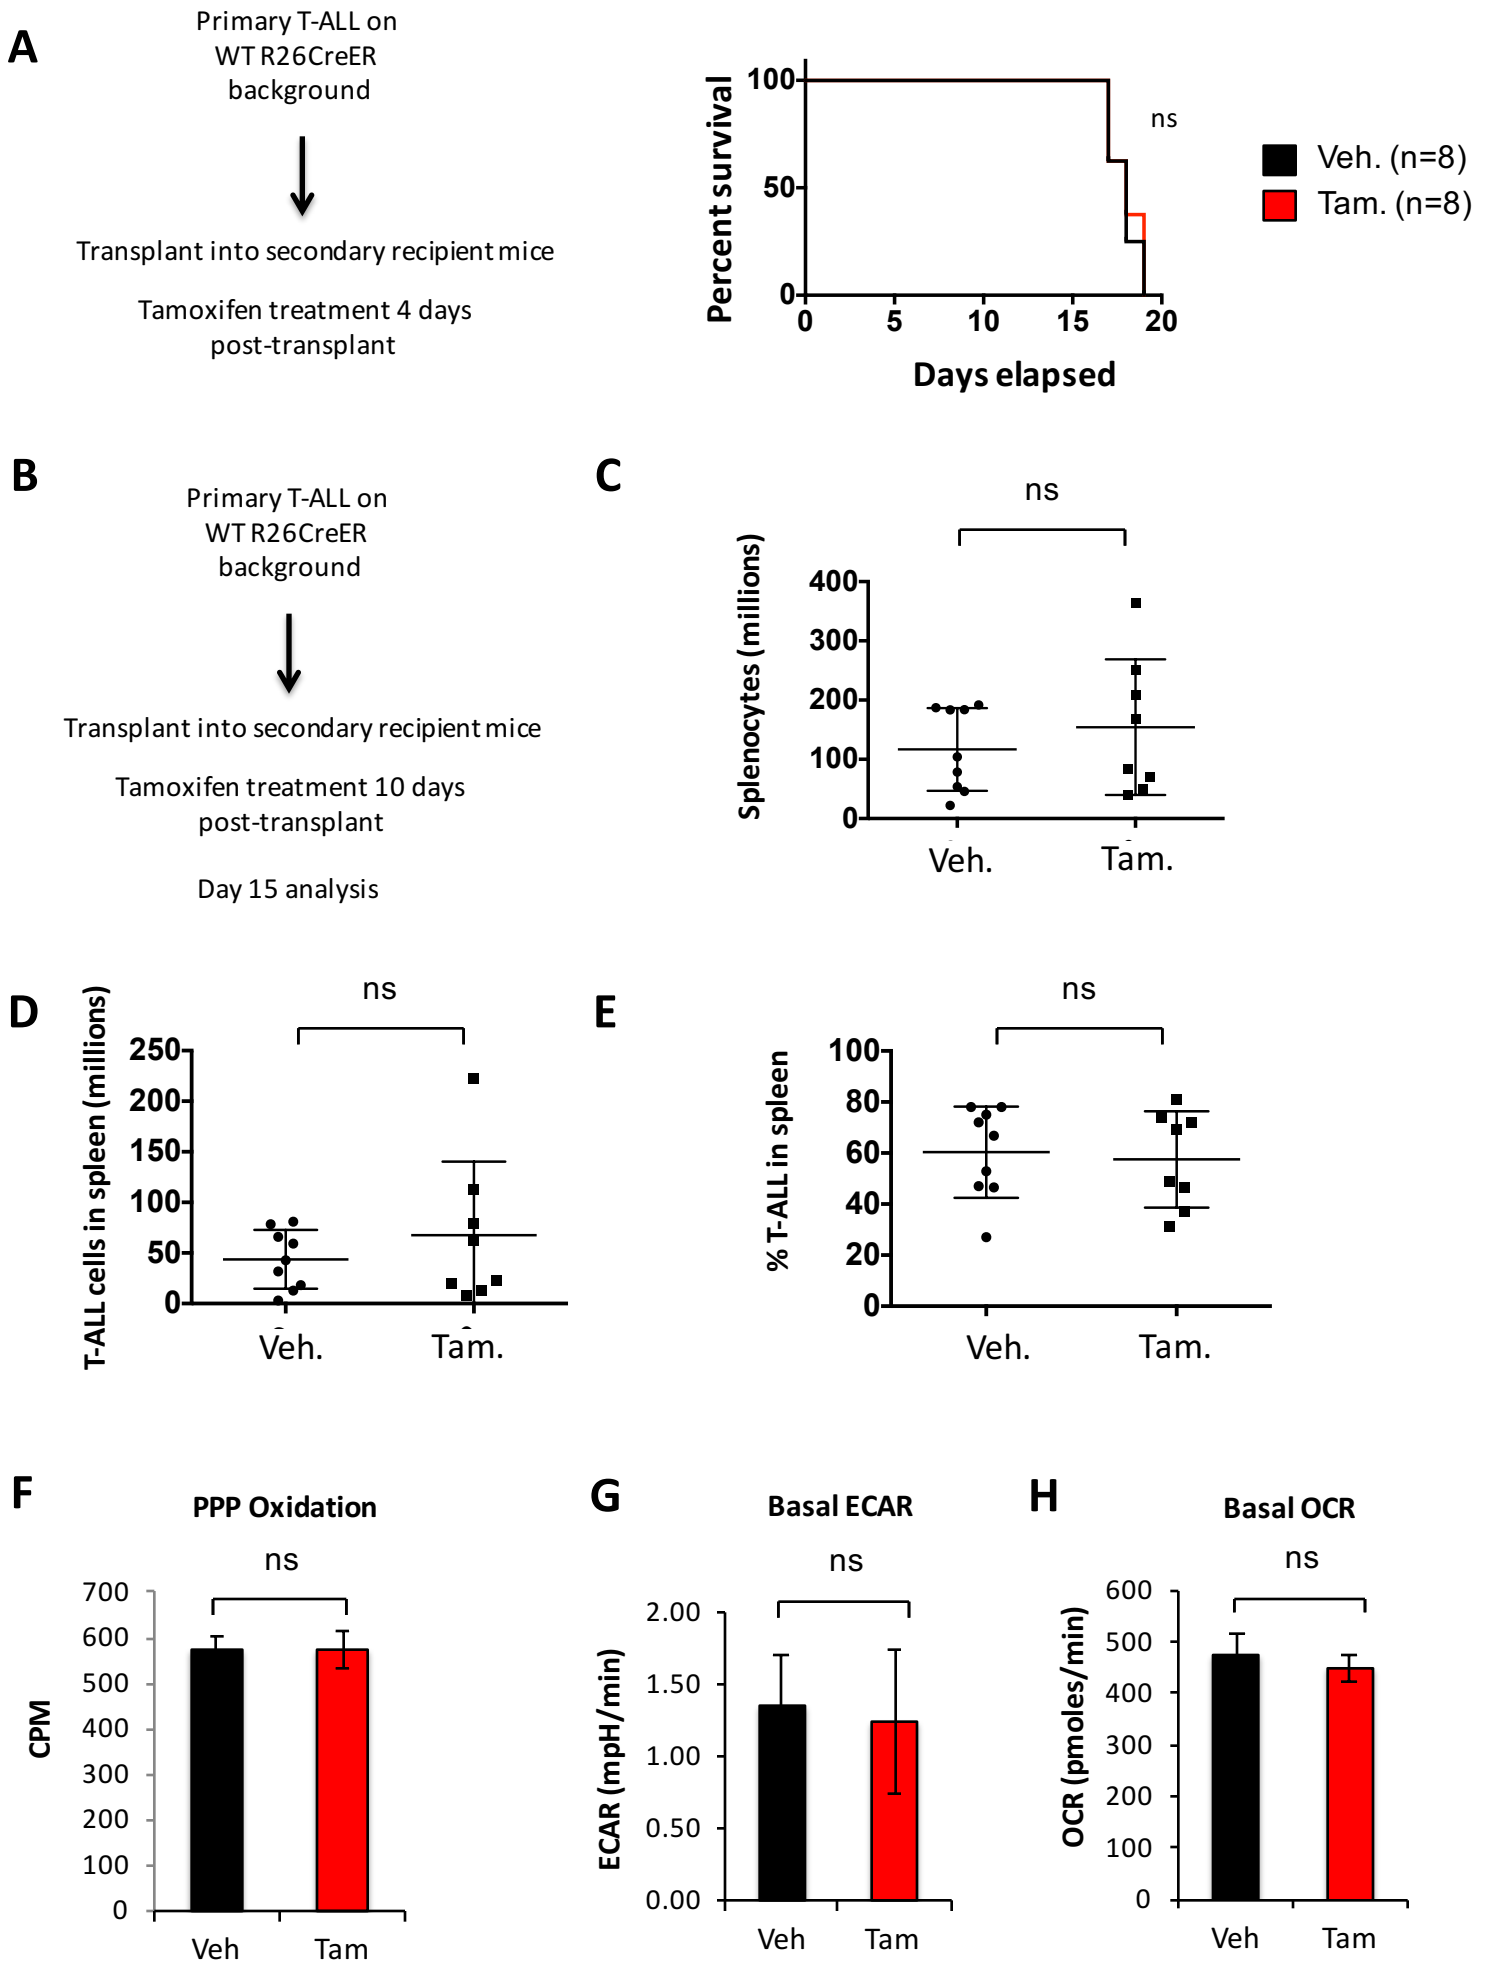

Sup. Figure 3

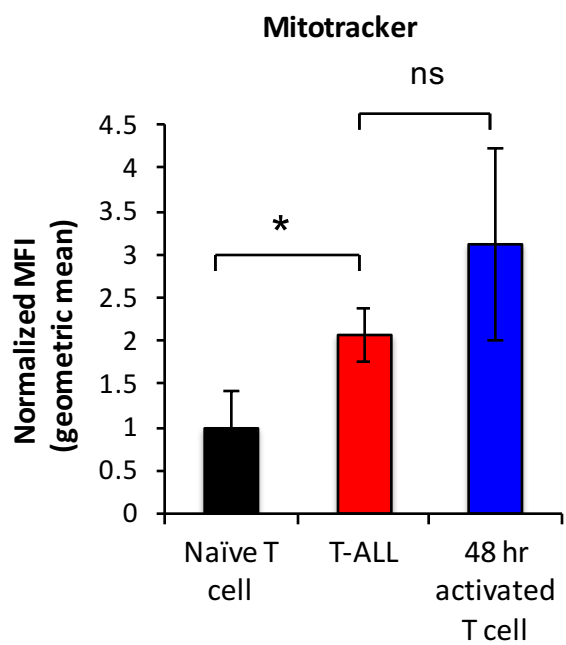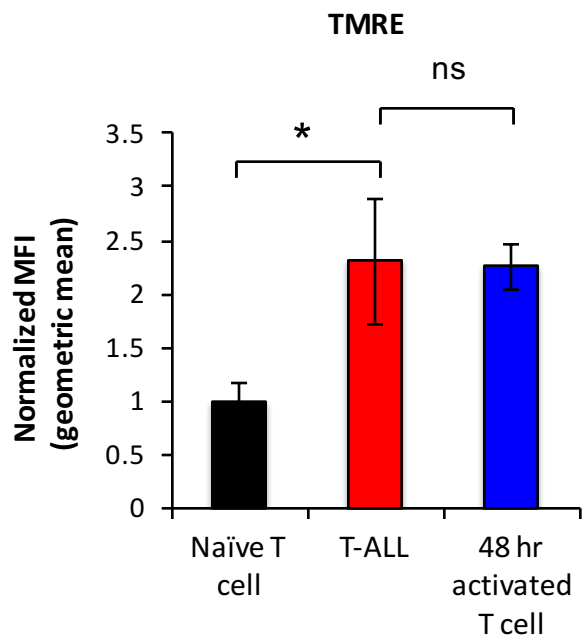

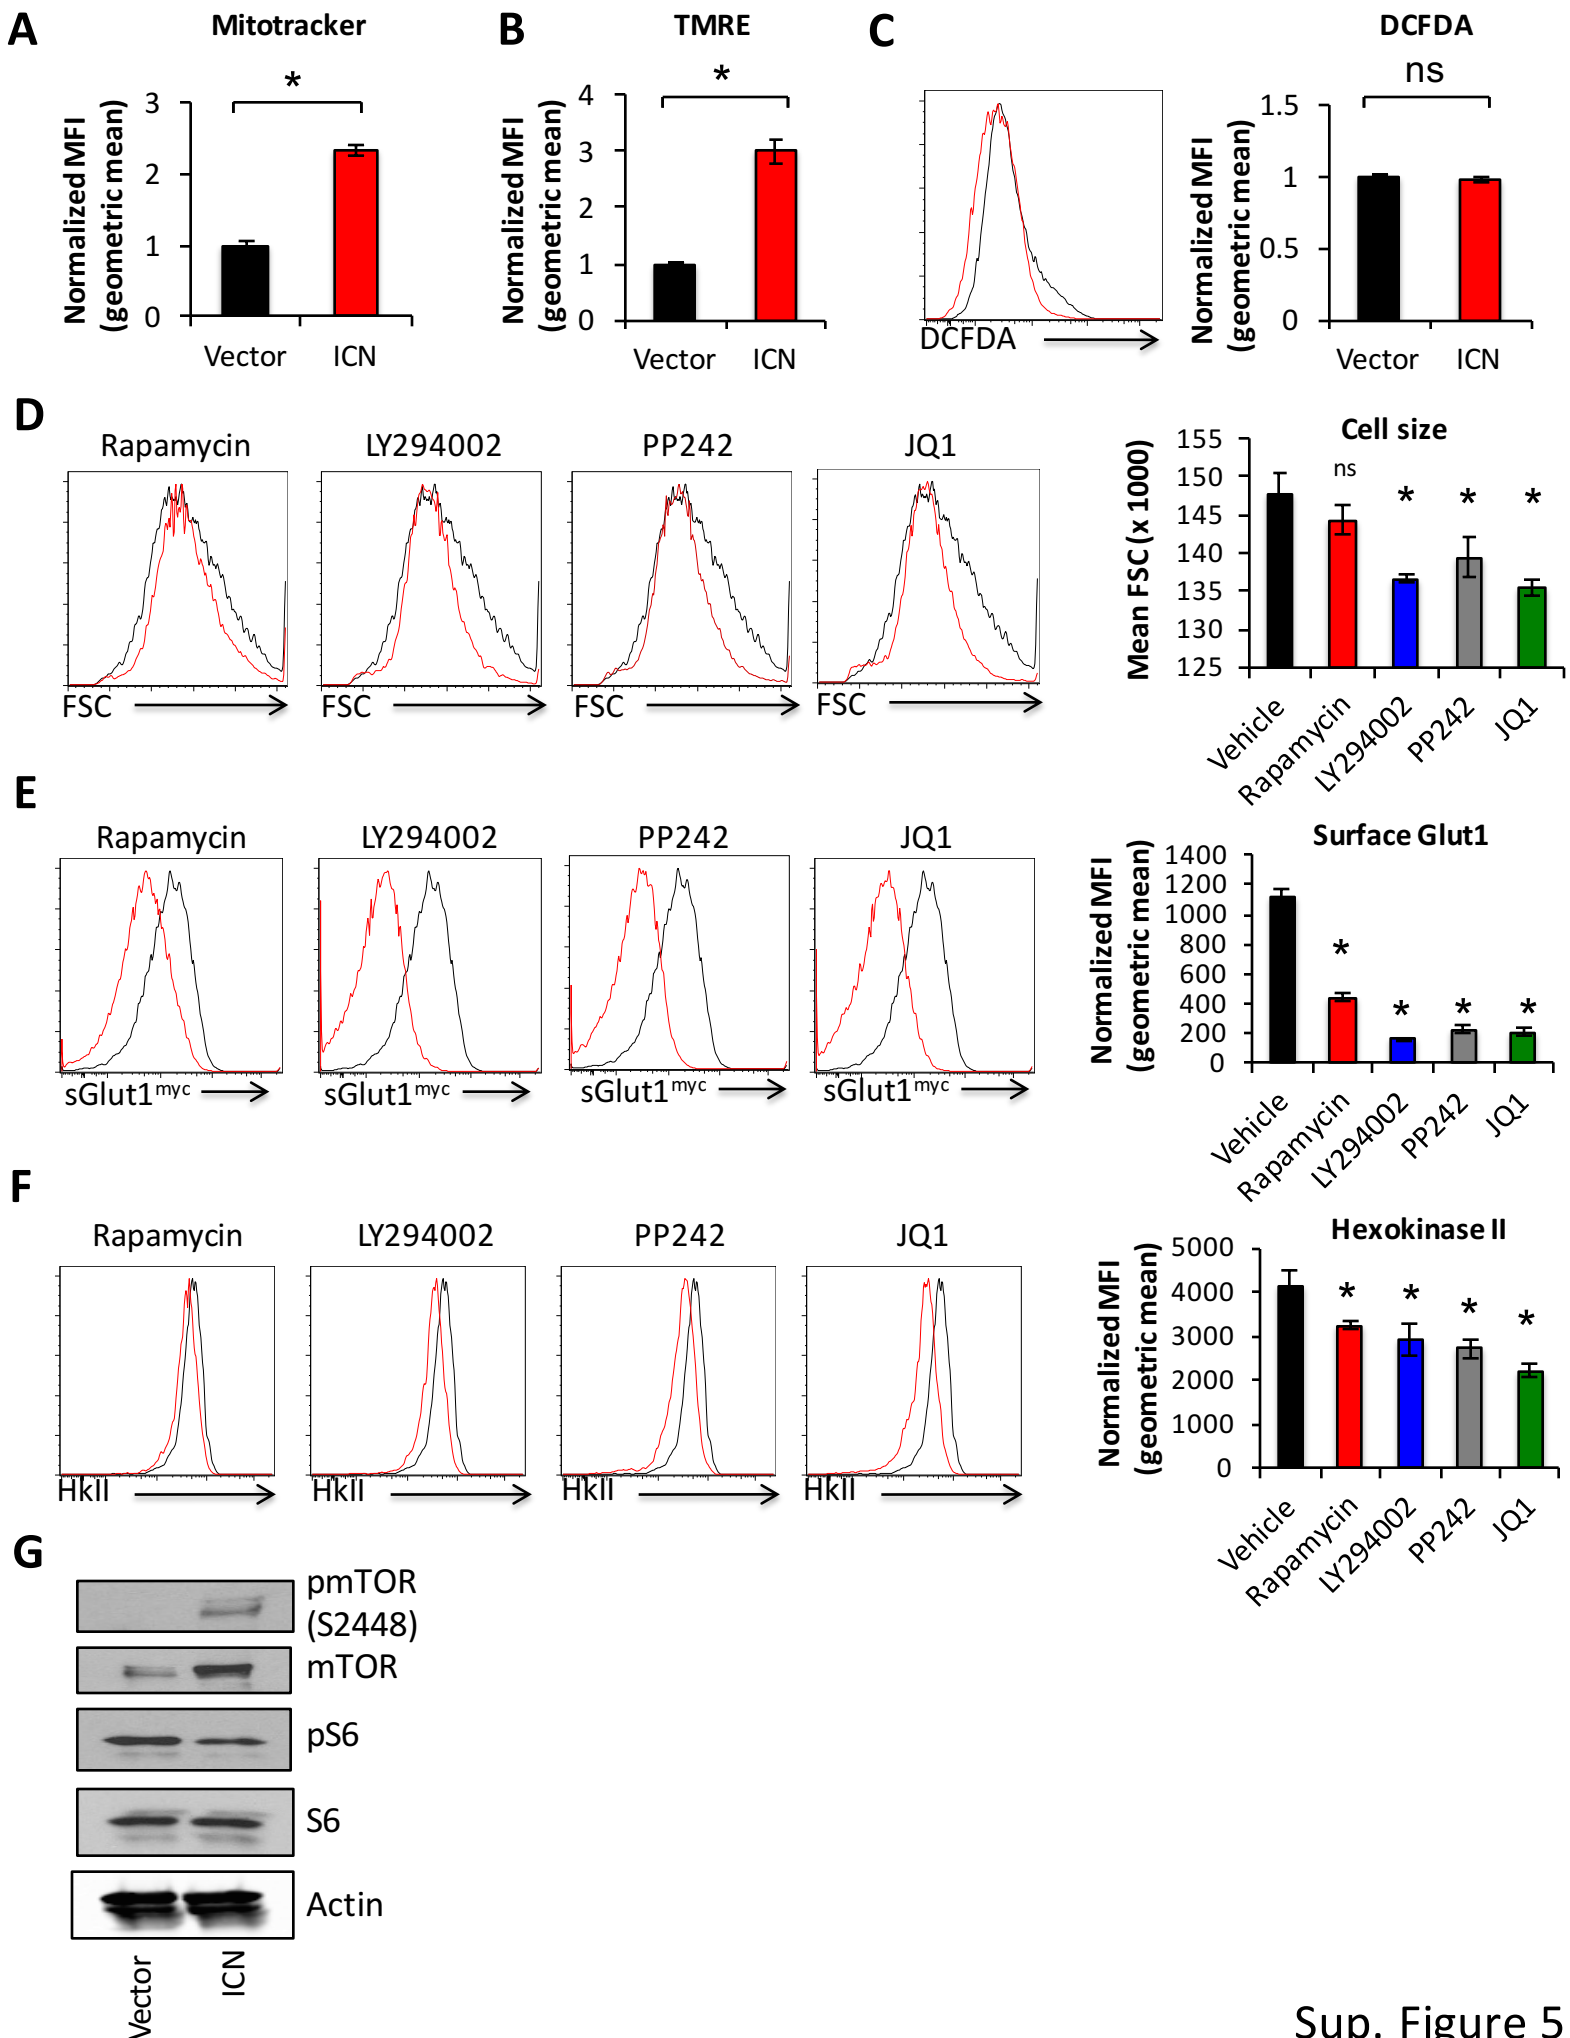

**A**

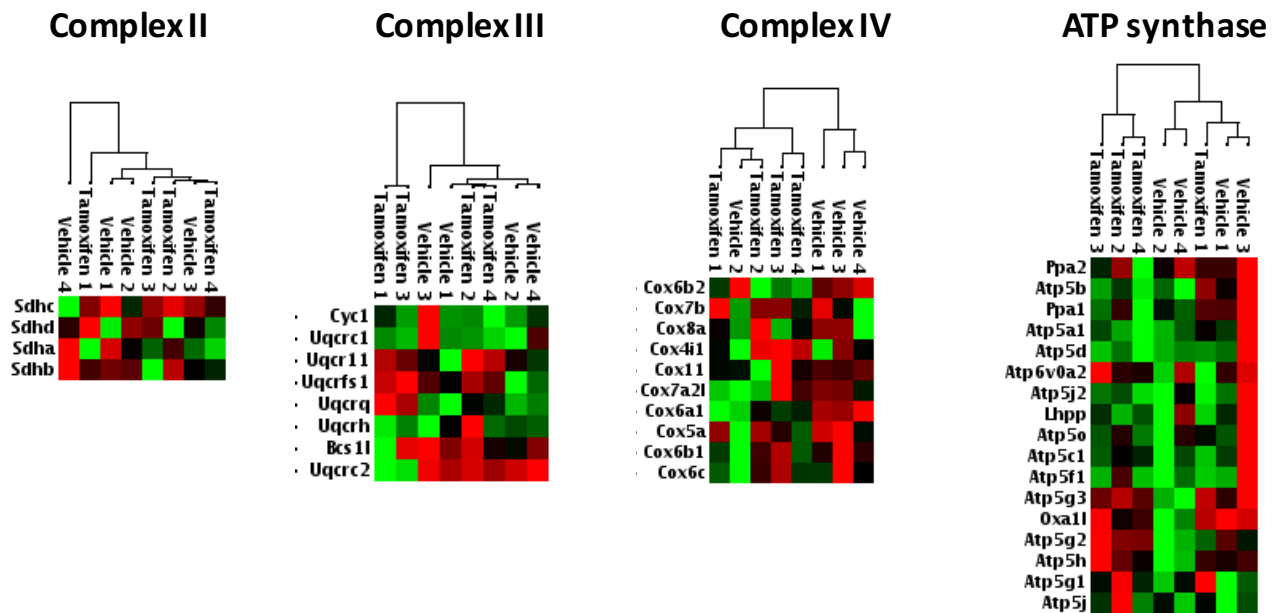

**B**

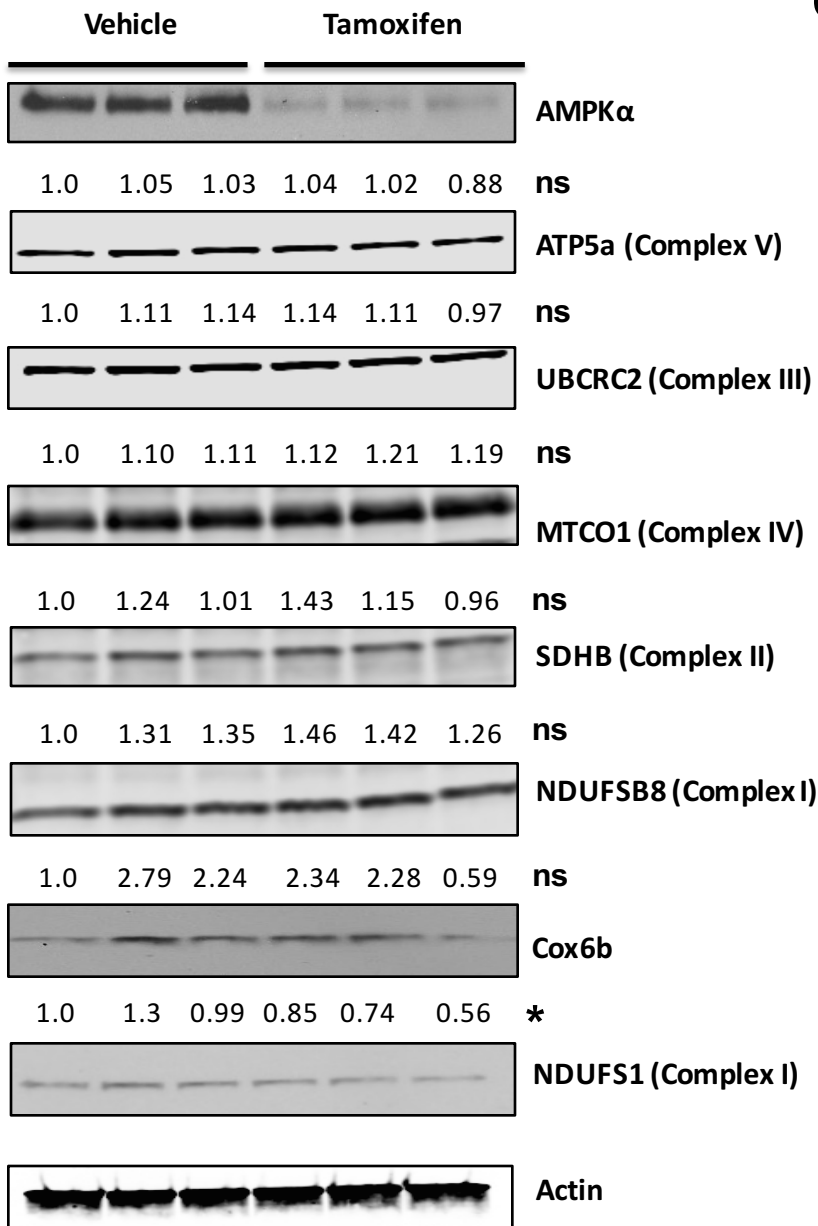

**C**

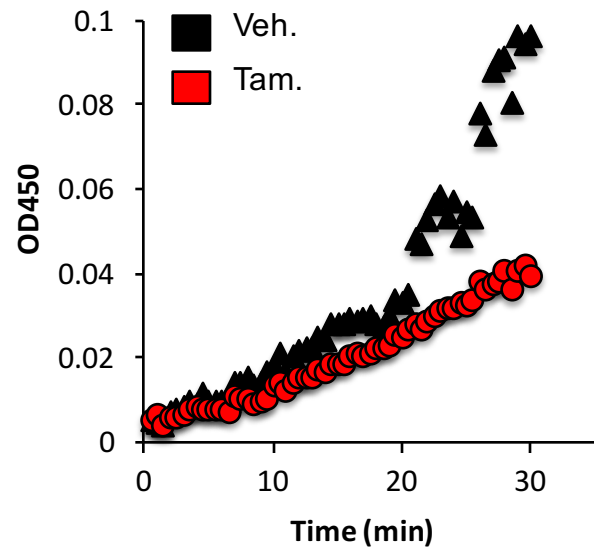

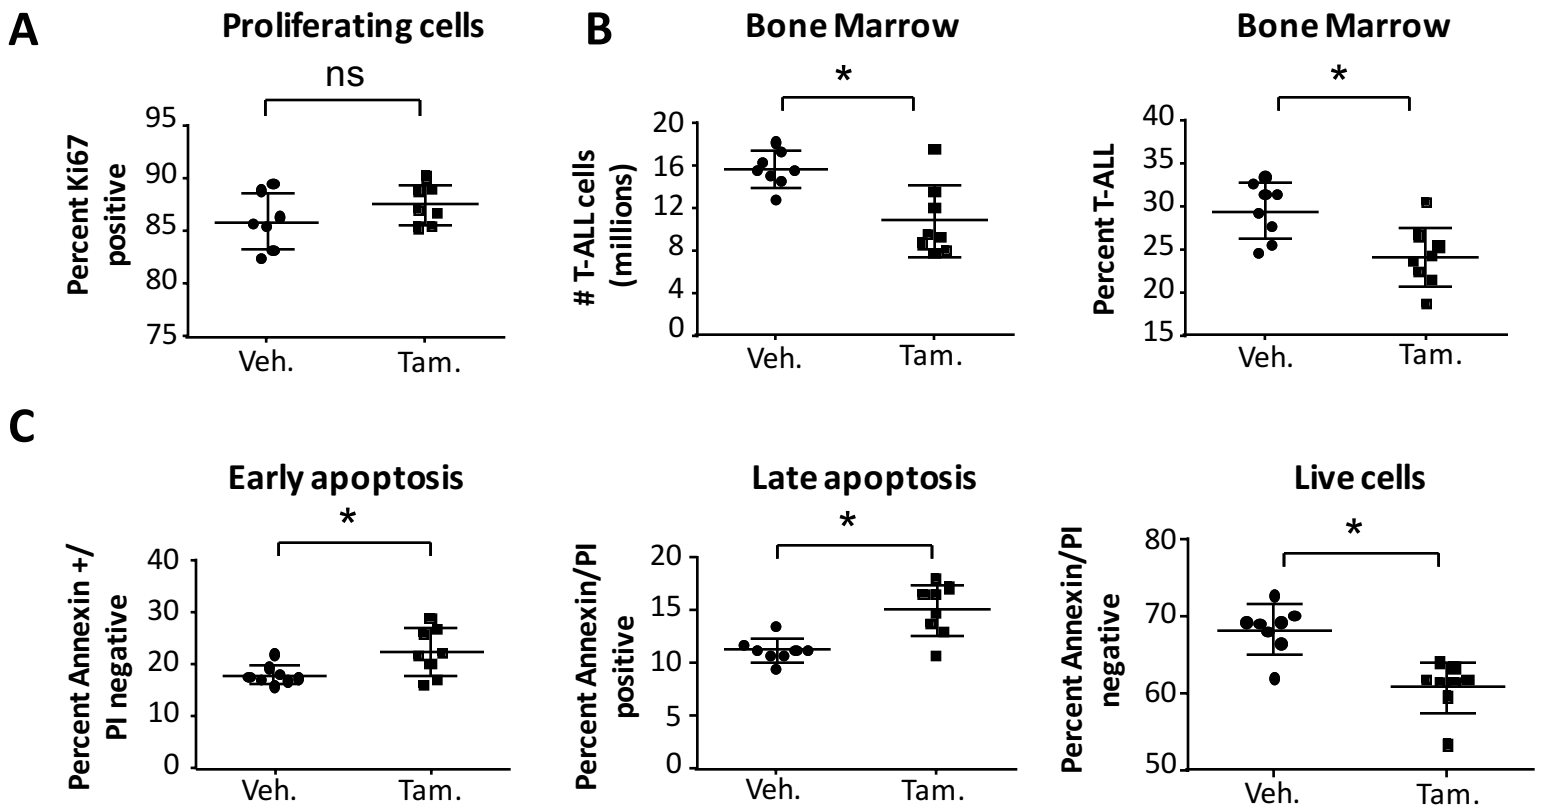

**D**

| Study design | Control cells | Gene title | Control mean | T-ALL mean | Log FC | p value | Adj. p value | Reference                  | GEO Accession |
|--------------|---------------|------------|--------------|------------|--------|---------|--------------|----------------------------|---------------|
| RNAseq       | T cells       | PRKAA1     | 2727.551     | 3332.801   | 0.289  | 0.308   | 0.499        | Sanghvi <i>et al</i> 2014  | GSE63602      |
| Microarray   | Bone marrow   | PRKAA1     | 7.6016       | 7.0166     | 0.585  | 0.069   | 0.210        | Homminga <i>et al</i> 2011 | GSE26713      |

**E**

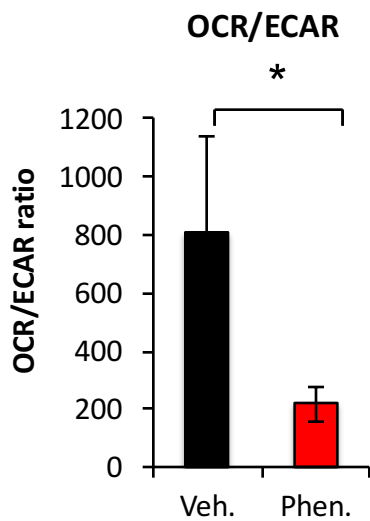

**F**

Primary T-ALL on Wildtype background

↓

Transplant into secondary recipient mice

Phenformin treatment days 2-12

Monitor survival

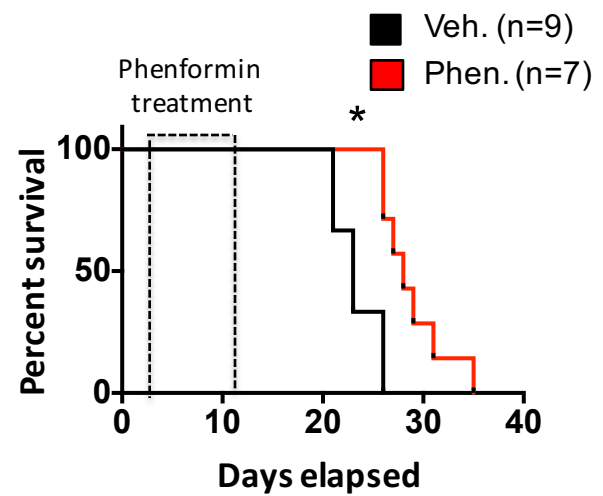

**Supplemental Table 3, related to Figure 2.** Metabolic pathways altered in T-ALL cells relative to naïve T cells. Naïve T cells and primary TALL cells were isolated and extracted for high resolution LC-QE-MS metabolomics. Metabolites altered by 1.5-fold or more ( $p < 0.05$ ) were analyzed using Metaboanalyst Pathway Analysis and are listed below in respective pathways. Metabolites found to be significantly enriched in T-ALL cells compared to naïve T cells are indicated in red, while those significantly depleted in T-ALL cells compared to naïve T cells are indicated in green.

|                                                |                                                                                                                                                      |
|------------------------------------------------|------------------------------------------------------------------------------------------------------------------------------------------------------|
| <b>Citric acid cycle</b>                       | Citric acid, Fumaric acid, L-Malic acid, oxalacetic acid, NAD, guanosine diphosphate, ADP, Coenzyme A, NADH, ATP, FAD                                |
| <b>Glutathione metabolism</b>                  | Glycine, Glutathione, Pyroglutamic acid, gamma-glutamylcysteine, oxidized glutathione                                                                |
| <b>Pyrimidine metabolism</b>                   | Cytidine triphosphate, cytidine, cytidine monophosphate, Uridine 5'monophosphate, uridine 5'-diphosphate, uracil, dCTP, dCMP, 5-thymidylic acid, CDP |
| <b>Aspartate metabolism</b>                    | Fumaric acid, oxalacetic acid, N-acetyl-L-aspartic acid, citrulline, D-Aspartic acid                                                                 |
| <b>Oxidation of branched chain amino acids</b> | L-carnitine, L-acetylcarnitine, pristanic acid, propionyl carnitine, coenzyme A                                                                      |
| <b>Methionine metabolism</b>                   | Betaine, glycine, L-serine, L-homoserine, S-adenosylhomocysteine, 5'-methylthioadenosine, S-adenosylmethionine                                       |
| <b>Urea cycle</b>                              | Fumaric acid, L-alanine, ornithine, oxalacetic acid, citrulline, ADP                                                                                 |
| <b>Glutamate metabolism</b>                    | Glutathione, NAD, gamma-glutamylcysteine, 5-phosphoribosylamine, oxidized glutathione                                                                |
| <b>Amino sugar metabolism</b>                  | N-acetyl-D-glucosamine, N-                                                                                                                           |



|                                   |                                                      |
|-----------------------------------|------------------------------------------------------|
|                                   | acetylneuraminic acid, glucosamine                   |
| <b>Glycerol phosphate shuttle</b> | FAD, glyceric acid 1,3-biphosphate                   |
| <b>Glycolysis</b>                 | Phosphoenolpyruvate, ATP, Glycerate 1,3-bisphosphate |

**Supplemental Table 4, related to Figure 2.** Metabolic pathways altered in T-ALL cells relative to 48 hour activated T cells. T cells activated for 48 hours with anti-CD3 + anti-CD28 and primary TALL cells were isolated and extracted for high resolution LC-QE-MS metabolomics. Metabolites altered by 1.5-fold or more ( $p < 0.05$ ) were analyzed using Metaboanalyst Pathway Analysis and are listed below in respective pathways. Metabolites found to be significantly enriched in T-ALL cells compared to naïve T cells are indicated in red, while those significantly depleted in T-ALL cells compared to activated T cells are indicated in green.

|                                                      |                                                                                                                                                                                                                                                    |
|------------------------------------------------------|----------------------------------------------------------------------------------------------------------------------------------------------------------------------------------------------------------------------------------------------------|
| <b>Oxidation of branched chain amino acids</b>       | L-carnitine, L-acetylcarnitine, propionyl carnitine, coenzyme A                                                                                                                                                                                    |
| <b>Aspartate metabolism</b>                          | L-aspartic acid, n-acetyl-L-aspartic acid, citrulline                                                                                                                                                                                              |
| <b>Beta oxidation of very long chain fatty acids</b> | L-carnitine, L-acetylcarnitine, coenzyme A                                                                                                                                                                                                         |
| <b>Gluconeogenesis</b>                               | D-glucose, oxoglutaric acid, oxalacetic acid, pyruvic acid, phosphoenolpyruvic acid, ATP, 3-phosphoglyceric acid, NAD, glyceraldehyde 3-phosphate, GDP, glyceric acid 1,3-bisphosphate, ADP, glucose 6-phosphate, dihydroxyacetone phosphate, NADH |
| <b>Citric acid cycle</b>                             | cis-aconitic acid, citric acid, fumaric acid, L-malic acid, oxoglutaric acid, oxalacetic acid, pyruvic acid, ATP, NAD, GDP, ADP, NADH                                                                                                              |
| <b>Glycolysis</b>                                    | D-glucose, pyruvic acid, phosphoenolpyruvic acid, ATP, 3-phosphoglyceric acid, NAD, glyceraldehyde 3-phosphate, glyceric acid 1,3-bisphosphate, ADP, glucose 6-phosphate, dihydroxyacetone phosphate, NADH                                         |
| <b>Mitochondrial electron transport chain</b>        | Glycerol 3-phosphate, fumaric acid, ATP, NAD, glyceraldehyde 3-phosphate, glyceric acid 1,3-bisphosphate, ADP, dihydroxyacetone phosphate, NADH                                                                                                    |
| <b>Alanine metabolism</b>                            | glyoxylic acid, L-alanine, oxoglutaric acid, oxalacetic acid, pyruvic acid                                                                                                                                                                         |
| <b>Ammonia recycling</b>                             | glycine, L-histidine, L-serine, oxoglutaric acid, pyruvic acid, ATP, NAD, ADP, NADH                                                                                                                                                                |
| <b>Glucose-alanine cycle</b>                         | L-alanine, oxoglutaric acid, NADP, NADPH, pyruvic acid, NAD, NADH                                                                                                                                                                                  |
| <b>Glutathione metabolism</b>                        | cysteinylglycine, glycine, glutathione, NADP, NADPH, gamma-glutamylcysteine                                                                                                                                                                        |
| <b>Urea cycle</b>                                    | argininosuccinic acid, fumaric acid, L-alanine, oxoglutaric acid, oxalacetic acid, pyruvic acid, arginine, ATP, ADP                                                                                                                                |
| <b>Glycerol phosphate shuttle</b>                    | glycerol 3-phosphate, NAD, glyceraldehyde 3-phosphate, glyceric acid 1,3-bisphosphate, dihydroxyacetone phosphate                                                                                                                                  |
| <b>Methionine metabolism</b>                         | glycine, L-serine, ATP, L-methionine, S-adenyosylhomocysteine, 5'-methylthioadenosine, S-adenosylmethionine, 2-oxo-4-methylthiobutanoic acid, methionine sulfoxide                                                                                 |
| <b>Histidine metabolism</b>                          | 1-methylhistidine, carnosine, L-histidine, formiminoglutamic acid, methylimidazoleacetic acid                                                                                                                                                      |

|                                     |                                                                                                                                                                              |
|-------------------------------------|------------------------------------------------------------------------------------------------------------------------------------------------------------------------------|
| <b>Pyrimidine metabolism</b>        | deoxycytidine, ureidopropionic acid, dihydrothymine, CTP, orotic acid, uridine triphosphate, Uridine 5'-diphosphate, uracil, ureidosuccinic acid, CDP, ureidoisobutyric acid |
| <b>Malate-aspartate shuttle</b>     | oxoglutaric acid, oxalacetic acid, NAD, NADH                                                                                                                                 |
| <b>Nucleotide sugars metabolism</b> | uridine diphosphate glucose, uridine diphosphate glucuronic acid, UDP-D-xylose, glucose 6-phosphate                                                                          |

**Supplemental Table 5, related to Figure 5:** Glucose metabolism qPCR Array Ct values for Figure 5D. Secondary recipient mice were transplanted with T-ALL from an AMPK $\alpha$ 1flox/flox;Rosa26CreERT2 background primary cancer and treated with vehicle or tamoxifen. T-ALL cell were isolated and metabolic gene expression was determined by qrt-PCR array. Ct values for each independent mouse are provided.

| Symbol | Vehicle 1 | Vehicle 2 | Vehicle 3 | Vehicle 4 | Tamoxifen 1 | Tamoxifen 2 | Tamoxifen 3 | Tamoxifen 4 |
|--------|-----------|-----------|-----------|-----------|-------------|-------------|-------------|-------------|
| Acly   | 23.37     | 23.22     | 23.54     | 23.24     | 23.71       | 24.04       | 23.6        | 23.36       |
| Aco1   | 26.57     | 26.54     | 26.63     | 26.48     | 26.87       | 27.04       | 26.5        | 26.65       |
| Aco2   | 24.03     | 24.01     | 24.05     | 24.16     | 24.18       | 24.6        | 24.19       | 24.28       |
| Agl    | 28.61     | 28.62     | 28.54     | 28.39     | 28.4        | 28.95       | 28.22       | 28.47       |
| Aldoa  | 22.04     | 21.89     | 21.57     | 21.89     | 22.2        | 22.88       | 22.16       | 22.29       |
| Aldob  | 35        | 35        | 35        | 35        | 35          | 35          | 35          | 35          |
| Aldoc  | 31.46     | 32.07     | 32.09     | 31.28     | 31.37       | 31.95       | 31.91       | 31.57       |
| Bpgm   | 26.01     | 26.22     | 26.18     | 25.91     | 26.28       | 26.59       | 26.03       | 26.23       |
| Cs     | 27.83     | 27.94     | 27.45     | 27.79     | 27.85       | 28.32       | 27.71       | 28.05       |
| Dlat   | 26.06     | 25.74     | 26.05     | 25.63     | 26.05       | 26.27       | 26.21       | 26.09       |
| Dld    | 24.19     | 23.84     | 23.62     | 23.68     | 24.22       | 24.58       | 23.79       | 24.04       |
| Dlst   | 24.41     | 24.81     | 24.32     | 24.39     | 24.6        | 25.36       | 24.27       | 24.55       |
| Eno1   | 21.35     | 21.23     | 21.16     | 21.31     | 21.34       | 21.63       | 21.42       | 21.57       |
| Eno2   | 32.31     | 32.73     | 33.25     | 32.93     | 33.26       | 33.39       | 33.02       | 32.42       |
| Eno3   | 29.2      | 29.18     | 29.35     | 29.03     | 29.52       | 29.66       | 28.97       | 29.2        |
| Fbp1   | 35        | 34.52     | 34.32     | 30.42     | 32.2        | 31.31       | 33.06       | 33.57       |
| Fbp2   | 34.84     | 35        | 35        | 34.74     | 35          | 35          | 35          | 35          |
| Fh1    | 24.4      | 24.22     | 24.19     | 24.26     | 24.59       | 24.75       | 24.43       | 24.6        |
| G6pc   | 35        | 35        | 35        | 35        | 35          | 35          | 35          | 35          |
| G6pc3  | 26.55     | 26.71     | 26.55     | 26.88     | 27.06       | 27.28       | 26.67       | 26.82       |
| G6pdx  | 24.57     | 24.56     | 24.31     | 24.45     | 24.97       | 25.3        | 24.4        | 24.63       |
| Galm   | 28.65     | 28.26     | 28.66     | 27.93     | 28.57       | 28.49       | 28.45       | 28.24       |
| Gapdhs | 34.23     | 35        | 35        | 34.25     | 34.72       | 35          | 34.33       | 34.57       |
| Gbe1   | 28.24     | 28.32     | 28.12     | 28.15     | 28.29       | 28.55       | 27.64       | 28.05       |
| Gck    | 35        | 35        | 35        | 35        | 35          | 35          | 35          | 35          |
| Gpi1   | 22.57     | 22.59     | 22.48     | 22.54     | 22.93       | 23.31       | 22.52       | 22.7        |
| Gsk3a  | 23.75     | 23.85     | 24.06     | 23.74     | 24.05       | 24.2        | 24.01       | 24.02       |
| Gsk3b  | 25.36     | 25.34     | 25.54     | 25.36     | 25.61       | 25.91       | 25.19       | 25.39       |
| Gys1   | 27.63     | 27.78     | 28.09     | 27.69     | 28.09       | 28.13       | 27.87       | 28.27       |
| Gys2   | 35        | 35        | 35        | 35        | 35          | 35          | 35          | 35          |
| H6pd   | 28.08     | 28.09     | 28.12     | 28.07     | 28.57       | 28.51       | 27.72       | 28.16       |
| Hk2    | 28.85     | 28.32     | 28.39     | 28.18     | 28.49       | 29.21       | 28.9        | 29.06       |
| Hk3    | 30.32     | 30.64     | 31        | 30.61     | 30.91       | 31.03       | 29.58       | 30.03       |
| Idh1   | 27.95     | 28.07     | 27.93     | 28.2      | 28.53       | 29.02       | 27.86       | 27.98       |
| Idh2   | 24.89     | 24.95     | 25.09     | 24.85     | 25.23       | 25.34       | 24.95       | 24.91       |
| Idh3a  | 23.33     | 23.07     | 23.04     | 23.17     | 23.46       | 23.75       | 23.48       | 23.55       |
| Idh3b  | 23.85     | 23.68     | 23.57     | 23.79     | 23.67       | 24.11       | 23.64       | 23.99       |
| Idh3g  | 23.1      | 23.23     | 23.19     | 23.59     | 23.38       | 23.67       | 23.14       | 23.28       |
| Mdh1   | 23.34     | 23.13     | 23.27     | 23.52     | 23.39       | 23.77       | 23.52       | 23.55       |
| Mdh1b  | 35        | 35        | 35        | 35        | 35          | 35          | 35          | 35          |
| Mdh2   | 23.1      | 23.01     | 22.94     | 23.22     | 23.23       | 23.42       | 23.27       | 23.31       |

|          |       |       |       |       |       |       |       |       |
|----------|-------|-------|-------|-------|-------|-------|-------|-------|
| Ogdh     | 24.09 | 24.08 | 24.2  | 24.16 | 24.41 | 24.62 | 24.16 | 24.29 |
| Pck1     | 33.23 | 33.42 | 31.16 | 32.55 | 32.07 | 31.44 | 31.47 | 32.15 |
| Pck2     | 30.15 | 29.97 | 31.41 | 30.58 | 30.62 | 30.47 | 29.95 | 30    |
| Pcx      | 30.52 | 30.94 | 31.44 | 30.54 | 31.24 | 31.52 | 31.19 | 31.41 |
| Pdha1    | 23.16 | 23.35 | 22.92 | 23.22 | 23.3  | 23.59 | 23.11 | 23.5  |
| Pdhb     | 24.29 | 24.36 | 24.25 | 24.36 | 24.49 | 24.78 | 24.39 | 24.53 |
| Pdk1     | 25.61 | 25.51 | 25.34 | 25.67 | 25.59 | 26.08 | 25.59 | 25.55 |
| Pdk2     | 34.33 | 34.17 | 35    | 34.21 | 34.46 | 34.86 | 33.84 | 34.25 |
| Pdk3     | 25.51 | 25.37 | 25.6  | 25.61 | 25.67 | 25.99 | 25.67 | 25.89 |
| Pdk4     | 35    | 35    | 35    | 35    | 33.92 | 35    | 34.49 | 35    |
| Pdp2     | 26.56 | 26.84 | 27.02 | 26.76 | 27.19 | 27.28 | 26.87 | 27.04 |
| Pdpr     | 26.52 | 26.53 | 26.58 | 26.71 | 26.81 | 27.08 | 26.39 | 26.93 |
| Pfkl     | 25.85 | 25.46 | 25.34 | 25.61 | 25.81 | 26.3  | 25.78 | 26.32 |
| Pgam2    | 28.75 | 28.77 | 28.78 | 28.7  | 28.85 | 29.14 | 28.43 | 28.86 |
| Pgk1     | 22.7  | 22.46 | 22.28 | 22.83 | 22.82 | 23.23 | 22.8  | 23.01 |
| Pgk2     | 35    | 35    | 35    | 35    | 35    | 35    | 35    | 35    |
| Pgm1     | 25.83 | 25.87 | 26.08 | 26.12 | 26.27 | 26.32 | 25.87 | 26.07 |
| Pgm2     | 27.43 | 27.39 | 27.3  | 27.19 | 27.47 | 27.96 | 27.29 | 27.39 |
| Pgm3     | 27.19 | 27.13 | 27.28 | 27.3  | 27.64 | 27.82 | 27.05 | 27.43 |
| Phka1    | 35    | 35    | 34.56 | 35    | 34.1  | 33.95 | 32.84 | 34.48 |
| Phkb     | 27.43 | 27.46 | 27.88 | 27.4  | 27.73 | 27.78 | 27.53 | 27.78 |
| Phkg1    | 32.82 | 33.79 | 33.58 | 33.49 | 34.91 | 33.98 | 34.29 | 35    |
| Phkg2    | 25.83 | 25.97 | 25.96 | 25.96 | 26.23 | 26.4  | 25.7  | 25.71 |
| Pklr     | 32.13 | 32.26 | 31.13 | 31.34 | 31.45 | 31.47 | 30.28 | 30.6  |
| Prps1    | 24.31 | 24.06 | 24.12 | 24.56 | 24.45 | 24.87 | 24.34 | 24.54 |
| Prps111  | 35    | 35    | 35    | 35    | 35    | 35    | 35    | 35    |
| Prps2    | 23.29 | 23.35 | 23.46 | 23.45 | 23.49 | 23.92 | 23.55 | 23.52 |
| Pygl     | 31.71 | 31.41 | 31.71 | 31.64 | 31.98 | 32.11 | 30.81 | 31.27 |
| Pygm     | 30.09 | 30.47 | 30.33 | 30.36 | 31.01 | 30.95 | 29.62 | 29.83 |
| Rbks     | 27.17 | 27.04 | 26.79 | 26.91 | 27.39 | 27.43 | 26.89 | 27.01 |
| Rpe      | 24.68 | 24.5  | 24.8  | 24.93 | 24.91 | 25.21 | 24.74 | 25.05 |
| Rpia     | 24.43 | 24.25 | 24.5  | 24.33 | 24.68 | 24.78 | 24.29 | 24.52 |
| Sdha     | 23.43 | 23.34 | 23.37 | 23.45 | 23.74 | 24.01 | 23.44 | 23.73 |
| Sdhb     | 24.5  | 24.36 | 24.35 | 24.5  | 24.57 | 24.83 | 24.61 | 24.6  |
| Sdhc     | 24.06 | 23.94 | 24.11 | 24.14 | 24.34 | 24.5  | 24.26 | 24.23 |
| Sdhd     | 27.63 | 27.49 | 27.54 | 27.55 | 28.04 | 28.21 | 27.71 | 27.83 |
| Sucla2   | 25.25 | 25.29 | 25.29 | 25.4  | 25.56 | 25.87 | 25.41 | 25.63 |
| Suclg1   | 27.72 | 27.38 | 26.62 | 27.22 | 27.72 | 27.99 | 27.9  | 27.8  |
| Suclg2   | 24.96 | 24.82 | 24.66 | 25.12 | 25.09 | 25.4  | 25.05 | 25.18 |
| Taldo1   | 25.16 | 25.08 | 26.53 | 24.97 | 25.27 | 25.44 | 26.65 | 25.22 |
| Tkt      | 21.72 | 21.52 | 21.26 | 21.51 | 21.97 | 22.08 | 21.58 | 21.63 |
| Tpi1     | 23.93 | 23.42 | 23.31 | 23.67 | 23.73 | 24.25 | 24.07 | 24.11 |
| Ugp2     | 25.42 | 25.6  | 25.45 | 25.43 | 25.64 | 25.88 | 25.33 | 25.54 |
| Actb     | 18.44 | 18.48 | 19.5  | 18.48 | 18.8  | 18.98 | 18.28 | 18.82 |
| B2m      | 19.21 | 19.22 | 19.51 | 18.75 | 19.55 | 19.72 | 19.24 | 19.31 |
| Gapdh    | 20.79 | 20.68 | 20.55 | 20.55 | 20.9  | 21.24 | 20.85 | 20.9  |
| Gusb     | 25.59 | 25.59 | 25.62 | 25.92 | 25.91 | 26.05 | 25.75 | 25.99 |
| Hsp90ab1 | 19.64 | 19.45 | 19.33 | 19.65 | 19.84 | 20.06 | 19.8  | 19.89 |

**Supplemental Table 7, related to Figure 6:** Mitochondrial energy metabolism qPCR Array Ct values for Figure 6F, S6A. Secondary recipient mice were transplanted with T-ALL from an AMPK $\alpha$ 1flox/flox;Rosa26CreERT2 background primary cancer and treated with vehicle or tamoxifen. T-ALL cell were isolated and metabolic gene expression was determined by qrt-PCR array. Ct values for each independent mouse are provided.

| Symbol   | Vehicle 1 | Vehicle 2 | Vehicle 3 | Vehicle 4 | Tamoxifen 1 | Tamoxifen 2 | Tamoxifen 3 | Tamoxifen 4 |
|----------|-----------|-----------|-----------|-----------|-------------|-------------|-------------|-------------|
| Atp12a   | 35        | 35        | 35        | 35        | 35          | 35          | 35          | 35          |
| Atp4a    | 33.75     | 33.28     | 33.78     | 34.13     | 33.65       | 33.22       | 32.73       | 33.51       |
| Atp4b    | 35        | 35        | 34.84     | 34.9      | 35          | 35          | 35          | 34.93       |
| Atp5a1   | 21.49     | 21.44     | 21.72     | 22.08     | 21.3        | 21.58       | 21.63       | 21.75       |
| Atp5b    | 20.63     | 20.55     | 20.95     | 21.39     | 20.41       | 20.67       | 20.88       | 20.89       |
| Atp5c1   | 22.21     | 22.2      | 22.46     | 22.78     | 22.18       | 22.15       | 22.36       | 22.27       |
| Atp5d    | 23.2      | 23.09     | 23.39     | 23.78     | 23.09       | 23.19       | 23.4        | 23.41       |
| Atp5f1   | 22.35     | 22.27     | 22.44     | 22.85     | 22.25       | 22.11       | 22.48       | 22.45       |
| Atp5g1   | 22.9      | 22.68     | 23.21     | 23.23     | 22.31       | 22.44       | 22.79       | 22.77       |
| Atp5g2   | 22.41     | 22.54     | 22.97     | 23.2      | 22.43       | 22.36       | 22.4        | 22.46       |
| Atp5g3   | 21.25     | 21.23     | 21.6      | 22.01     | 21.03       | 21.16       | 21.34       | 21.31       |
| Atp5h    | 21.62     | 21.97     | 22.03     | 22.56     | 21.44       | 21.5        | 21.43       | 21.73       |
| Atp5j    | 21.89     | 21.54     | 22.23     | 22.41     | 21.57       | 21.52       | 21.86       | 21.87       |
| Atp5j2   | 22.29     | 22.24     | 22.49     | 22.75     | 22.27       | 22.25       | 22.42       | 22.46       |
| Atp5o    | 23.01     | 22.94     | 23.3      | 23.5      | 22.83       | 22.93       | 23.14       | 23.11       |
| Atp6v0a2 | 24.25     | 24.37     | 24.57     | 24.7      | 24.46       | 24.25       | 24.19       | 24.36       |
| Atp6v0d2 | 33.28     | 33.63     | 33.17     | 33.22     | 33.47       | 32.6        | 32.54       | 32.42       |
| Atp6v1c2 | 32.88     | 32.57     | 32.99     | 32.87     | 33.22       | 33.12       | 32.32       | 32.88       |
| Atp6v1e2 | 35        | 35        | 35        | 35        | 35          | 35          | 35          | 35          |
| Atp6v1g3 | 35        | 35        | 34.21     | 35        | 35          | 34.85       | 35          | 35          |
| Bcs1l    | 27.63     | 27.73     | 27.9      | 28.19     | 28.43       | 27.48       | 27.59       | 27.92       |
| Cox11    | 28.65     | 28.74     | 29.16     | 29.15     | 28.74       | 29.93       | 28.37       | 28.88       |
| Cox4i1   | 21.48     | 21.32     | 21.73     | 21.9      | 21.2        | 21.19       | 21.32       | 21.3        |
| Cox4i2   | 31.01     | 31.47     | 31.38     | 30.88     | 31.77       | 30.6        | 30.86       | 31.41       |
| Cox5a    | 22.71     | 22.9      | 23.15     | 23.43     | 22.62       | 22.73       | 22.96       | 23.01       |
| Cox5b    | 31.79     | 31.54     | 31.54     | 31.8      | 31.33       | 31.19       | 31.57       | 31.54       |
| Cox6a1   | 22.1      | 22.25     | 22.59     | 22.6      | 22.33       | 22.21       | 22.41       | 22.34       |
| Cox6a2   | 34.24     | 33.77     | 33.26     | 34.35     | 33.7        | 34.22       | 32.37       | 32.72       |
| Cox6b1   | 22.27     | 22.21     | 22.66     | 22.83     | 22.17       | 22.25       | 22.34       | 22.4        |
| Cox6b2   | 28.13     | 27.83     | 28.56     | 28.58     | 28.14       | 28.47       | 28.46       | 28.48       |
| Cox6c    | 21        | 21        | 21.26     | 21.53     | 20.9        | 20.91       | 20.97       | 21.08       |
| Cox7a2   | 33.17     | 34.58     | 33.73     | 33.9      | 33.35       | 33.24       | 32.96       | 33.66       |
| Cox7a2l  | 22.53     | 22.76     | 23.02     | 23.24     | 22.73       | 22.83       | 22.55       | 22.67       |
| Cox7b    | 22.86     | 23        | 23.52     | 23.82     | 22.71       | 22.92       | 23.06       | 23.14       |
| Cox8a    | 23.71     | 23.71     | 24.18     | 24.51     | 23.65       | 23.63       | 24.03       | 23.87       |
| Cox8c    | 35        | 35        | 35        | 35        | 35          | 35          | 35          | 35          |
| Cyc1     | 23.92     | 23.76     | 23.91     | 24.35     | 23.64       | 23.89       | 24.06       | 24.16       |
| Lhpp     | 28.36     | 28.63     | 28.4      | 28.64     | 28.57       | 28.62       | 28.5        | 28.52       |
| Ndufa1   | 23.12     | 23.11     | 23.41     | 23.74     | 23.21       | 23.22       | 23.3        | 23.3        |
| Ndufa10  | 23.75     | 23.72     | 24.2      | 24.3      | 23.68       | 24.05       | 23.85       | 23.89       |
| Ndufa11  | 24.35     | 24.26     | 24.64     | 25.01     | 24.26       | 24.39       | 24.4        | 24.49       |

|          |       |       |       |       |       |       |       |       |
|----------|-------|-------|-------|-------|-------|-------|-------|-------|
| Ndufa2   | 24.91 | 24.97 | 25.37 | 25.65 | 25.05 | 25.03 | 25.18 | 25.16 |
| Ndufa3   | 23.42 | 23.62 | 23.75 | 24.06 | 23.71 | 23.36 | 23.72 | 23.51 |
| Ndufa4   | 22.11 | 21.99 | 22.29 | 22.65 | 21.98 | 22.02 | 22.13 | 22.14 |
| Ndufa5   | 23.71 | 23.72 | 24.12 | 24.41 | 23.62 | 23.7  | 23.9  | 24.03 |
| Ndufa6   | 23.14 | 23.24 | 23.56 | 23.9  | 23.32 | 23.26 | 23.42 | 23.42 |
| Ndufa7   | 23.78 | 23.76 | 24.13 | 24.26 | 23.86 | 23.89 | 23.78 | 23.91 |
| Ndufa8   | 23.79 | 23.81 | 24.16 | 24.18 | 23.86 | 23.71 | 24.04 | 23.82 |
| Ndufab1  | 29.28 | 29.07 | 29.4  | 29.72 | 29.02 | 28.88 | 29.4  | 29.44 |
| Ndufb10  | 24.81 | 24.7  | 25.15 | 25.59 | 24.75 | 24.86 | 25.01 | 25.08 |
| Ndufb2   | 23.43 | 23.39 | 23.98 | 24.09 | 23.66 | 23.56 | 23.76 | 23.78 |
| Ndufb3   | 23.55 | 23.68 | 24.13 | 24.31 | 23.48 | 23.38 | 23.66 | 23.64 |
| Ndufb4   | 24.23 | 24.25 | 24.57 | 24.82 | 23.99 | 24.34 | 24.28 | 24.32 |
| Ndufb5   | 23.79 | 23.78 | 24.25 | 24.28 | 23.74 | 23.58 | 23.85 | 23.86 |
| Ndufb6   | 23.94 | 23.92 | 24.23 | 24.47 | 24.01 | 24.14 | 24.31 | 24.29 |
| Ndufb7   | 23.48 | 23.56 | 24.09 | 24.15 | 23.23 | 23.23 | 23.34 | 23.33 |
| Ndufb8   | 23.24 | 23.12 | 23.42 | 23.61 | 23.05 | 23.05 | 23.27 | 23.21 |
| Ndufb9   | 23.15 | 23.15 | 23.38 | 23.8  | 23.12 | 23.33 | 23.33 | 23.32 |
| Ndufc1   | 23.32 | 23.31 | 23.35 | 23.94 | 23.32 | 23.11 | 23.5  | 23.48 |
| Ndufc2   | 22.39 | 22.28 | 22.73 | 23.03 | 22.19 | 22.35 | 22.47 | 22.51 |
| Ndufs1   | 24.97 | 24.98 | 25.24 | 25.46 | 24.74 | 25.18 | 25.26 | 25.41 |
| Ndufs2   | 23.66 | 23.7  | 24.19 | 24.31 | 23.72 | 23.86 | 24.01 | 24.05 |
| Ndufs3   | 24.07 | 24.04 | 24.34 | 24.63 | 24.06 | 24.18 | 24.28 | 24.2  |
| Ndufs4   | 24.2  | 24.13 | 24.64 | 24.66 | 24.14 | 24.14 | 24.44 | 24.29 |
| Ndufs5   | 23.36 | 23.22 | 23.9  | 24.1  | 23.1  | 23.03 | 23.49 | 23.35 |
| Ndufs6   | 23.17 | 22.99 | 23.46 | 23.71 | 22.85 | 23.13 | 23.25 | 23.16 |
| Ndufs7   | 24.33 | 24.2  | 24.79 | 24.98 | 24.09 | 24.41 | 24.56 | 24.46 |
| Ndufs8   | 24.64 | 24.62 | 25.09 | 25.27 | 24.47 | 24.59 | 24.79 | 24.66 |
| Ndufv1   | 24.58 | 24.35 | 24.84 | 24.9  | 24.19 | 24.6  | 24.67 | 24.66 |
| Ndufv2   | 23.42 | 23.33 | 23.76 | 23.87 | 23.36 | 23.56 | 23.45 | 23.65 |
| Ndufv3   | 24.04 | 24.11 | 24.41 | 24.57 | 23.87 | 23.88 | 23.89 | 23.99 |
| Oxa1l    | 24.7  | 25.18 | 25.23 | 25.73 | 24.65 | 24.96 | 24.84 | 25    |
| Ppa1     | 24.54 | 24.49 | 24.82 | 25.34 | 24.4  | 24.57 | 24.92 | 25.1  |
| Ppa2     | 25.58 | 25.45 | 25.9  | 26.04 | 25.44 | 25.49 | 25.78 | 25.94 |
| Sdha     | 23.36 | 23.31 | 24.03 | 23.91 | 23.52 | 23.44 | 23.67 | 23.7  |
| Sdha     | 23.36 | 23.31 | 24.03 | 23.91 | 23.52 | 23.44 | 23.67 | 23.7  |
| Sdha     | 23.36 | 23.31 | 24.03 | 23.91 | 23.52 | 23.44 | 23.67 | 23.7  |
| Sdha     | 23.36 | 23.31 | 24.03 | 23.91 | 23.52 | 23.44 | 23.67 | 23.7  |
| Sdhb     | 24.39 | 24.24 | 24.91 | 24.91 | 24.28 | 24.36 | 24.67 | 24.53 |
| Sdhc     | 24.17 | 24.15 | 24.69 | 24.99 | 24.1  | 24.17 | 24.35 | 24.35 |
| Sdhd     | 27.91 | 27.54 | 28.24 | 28.32 | 27.52 | 27.9  | 27.85 | 27.93 |
| Uqcr11   | 26.74 | 26.33 | 27    | 27.13 | 26.25 | 26.31 | 26.56 | 26.46 |
| Uqcrc1   | 23.06 | 22.97 | 23.3  | 23.49 | 22.93 | 23.06 | 23.22 | 23.19 |
| Uqcrc2   | 23.29 | 23.06 | 23.64 | 23.71 | 24.23 | 23.2  | 24.38 | 23.39 |
| Uqcrcs1  | 22.73 | 22.69 | 23.17 | 23.35 | 22.5  | 22.64 | 22.74 | 22.76 |
| Uqcrh    | 25.11 | 24.98 | 25.72 | 25.72 | 25.1  | 24.97 | 25.3  | 25.24 |
| Uqcrcq   | 22.66 | 22.45 | 23.07 | 23.15 | 22.27 | 22.52 | 22.57 | 22.62 |
| Actb     | 18.51 | 18.34 | 19.12 | 19.16 | 18.52 | 18.38 | 18.54 | 18.28 |
| B2m      | 19.17 | 19.24 | 19.5  | 19.7  | 19.59 | 18.82 | 19.15 | 19.15 |
| Gapdh    | 20.61 | 20.5  | 20.88 | 21.35 | 20.35 | 20.49 | 20.91 | 20.96 |
| Gusb     | 25.43 | 25.3  | 25.86 | 25.86 | 25.35 | 25.46 | 25.64 | 25.6  |
| Hsp90ab1 | 19.67 | 19.48 | 20.02 | 20.24 | 19.35 | 19.75 | 19.83 | 20.01 |
